# Supplementary material for: Association Between Ambient Air Pollution and Birth Weight by Maternal Individual- and Neighborhood-Level Stressors
Source: PubMed Central journal article supplement (PMC9597392; doi:10.1001/jamanetworkopen.2022.38174), 2022-10-25
Supplement: jamanetwopen-e2238174-s001.pdf [file jamanetwopen-e2238174-s001.pdf]

## Supplementary Online Content

Niu Z, Habre R, Chavez TA, et al. Association between ambient air pollution and birth weight by maternal individual- and neighborhood-level stressors. *JAMA Netw Open*. 2022;5(10):e2238174. doi:10.1001/jamanetworkopen.2022.38174

**eMethods.** Detailed Methods

**eTable 1.** BDLIM Model Fitting of Various Effect Heterogeneity by the Joint Distribution of PSS and CES

**eTable 2.** Number of Close-by Air Quality Monitoring Stations and Distance to Nearest Air Quality Monitoring Station in the Overall Population and by CES

**eTable 3.** Distribution of Air Pollutant Concentrations and Temperature Among 628 Participants in the MADRES Cohort

**eTable 4A.** Population Characteristics and Birth Weight  $z$  Scores (BWZ) According to Individual and Neighborhood Level Stressors

**eTable 4B.** Population Characteristics and Birth Weight  $z$  Scores (BWZ) According to the Joint Distribution of Individual and Neighborhood Level Stressors

**eTable 5.** Average Weekly Effect Estimation of Air Pollution Exposure in Identified Sensitive Windows on Birth Weight

**eTable 6.** Population Characteristics and Birth Weight  $z$  Scores (BWZ) According to Preterm Birth Status Among All Participants in the MADRES Cohort (2015-2021)

**eFigure 1.** Flow Chart of Participants Included in This Analysis From the MADRES Cohort

**eFigure 2.** Theoretical Causal Structure Underlying the Association of Air Pollution Exposure With BWZ

**eFigure 3.** Sensitivity Analysis With Multiple Pollutants in DLM

**eFigure 4.** Sensitivity Analysis Adjusting for CES, PSS, or Both

**eFigure 5A.** Sensitivity Analysis With Various Knots Placement for PM<sub>2.5</sub> and PM<sub>10</sub>

**eFigure 5B.** Sensitivity Analysis With Various Knots Placement for NO<sub>2</sub> and O<sub>3</sub>

**eFigure 6.** Sensitivity Analysis With Complete Cases

This supplementary material has been provided by the authors to give readers additional information about their work.

## **eMethods. Detailed Methods**

All DLM included weekly temperature modeled with a cross-basis function of a 2-*df* natural cubic spline for the dose-response function and a 3-*df* a natural cubic spline for the lag-response function. We additionally applied the Bayesian Distributed Lag Interaction Models (BDLIM) to our data using the joint distribution of PSS and CES as the effect modifier. This analysis enabled us to determine how our data fit best for the heterogeneity among four possible patterns: a heterogeneity of the sensitive window only (BDLIM-w), a heterogeneity of the within-window effect only (BDLIM-b), a heterogeneity of both a sensitive window and within-window effect (BDLIM-bw), or no heterogeneity (BDLIM-n). BDLIM-n indicates no heterogeneity by the effect modifier, thus a homogeneous DLM fits the data best<sup>1</sup>. Similarly, BDLIM-bw supports that both the sensitive window and the effect within the sensitive window are different by the effect modifier, thus a stratified DLM fits the data best. Detailed information on the methodological development of BDLIM can be found from in the paper by Wilson et al.<sup>[1]</sup> As Wilson et al suggested, the best model fit can be determined by comparing the mean log posterior predictive density (MLPPD), where a larger MLPPD indicating a higher probability of effect heterogeneity pattern identification. As shown in the table below, analyses with PM<sub>2.5</sub>, PM<sub>10</sub>, NO<sub>2</sub> all support that BDLIM-bw has the highest probability (84.4%, 46.05, 98.7% for PM<sub>2.5</sub>, PM<sub>10</sub>, NO<sub>2</sub>, respectively) of effect heterogeneity pattern. BDLIM-w has the highest MLPPD for the analyses with O<sub>3</sub>, but there was no meaningful association between weekly O<sub>3</sub> exposure with birthweight in the first place. Therefore, results from the BDLIM analysis supported our use of stratified DLM. DLM/BDLIM analyses were conducted in R (4.2.0) with package *dlnm* (v2.4.7) and *regime*, all others in SAS (v9.4).

**eTable 1. BDLIM Model fitting of various effect heterogeneity by the joint distribution of PSS and CES**

| Air Pollutant     | Model    | DIC      | pD     | MLPPD |
|-------------------|----------|----------|--------|-------|
| PM <sub>2.5</sub> | BDLIM_bw | 1566.628 | 37.872 | 0.844 |
|                   | BDLIM_w  | 1554.055 | 23.406 | 0.127 |
|                   | BDLIM_b  | 1560.14  | 28.014 | 0.029 |
|                   | BDLIM_n  | 1561.694 | 23.266 | 0     |
| PM <sub>10</sub>  | BDLIM_bw | 1569.199 | 36.485 | 0.46  |
|                   | BDLIM_b  | 1556.694 | 23.707 | 0.35  |
|                   | BDLIM_w  | 1554.318 | 20.719 | 0.19  |
|                   | BDLIM_n  | 1562.933 | 23.949 | 0.001 |
| NO <sub>2</sub>   | BDLIM_bw | 1566.331 | 37.743 | 0.987 |
|                   | BDLIM_b  | 1558.76  | 25.737 | 0.012 |
|                   | BDLIM_w  | 1556.679 | 21.187 | 0.001 |
|                   | BDLIM_n  | 1559.681 | 23.055 | 0     |
| O <sub>3</sub>    | BDLIM_w  | 1558.259 | 22.596 | 0.511 |
|                   | BDLIM_b  | 1561.528 | 25.753 | 0.456 |
|                   | BDLIM_bw | 1575.655 | 37.22  | 0.032 |
|                   | BDLIM_n  | 1564.636 | 22.632 | 0.001 |

Note: DIC – deviance information criterion; pD – predictive density; MLPPD – mean log posterior predictive density.

#### eReference

1. Wilson A, Chiu YM, Hsu HL, Wright RO, Wright RJ, Coull BA. Bayesian distributed lag interaction models to identify perinatal windows of vulnerability in children's health. *Biostatistics* (Oxford, England). 2017;18(3):537-552.

**eTable 2. Number of close-by air quality monitoring stations and distance to nearest air quality monitoring station in the overall population and by CES**

|                                                                | Mean (SD)      |              |              | P-value |
|----------------------------------------------------------------|----------------|--------------|--------------|---------|
|                                                                | Overall sample | CES<50       | CES≥50       |         |
| <b>Number of close-by air quality monitoring station</b>       |                |              |              |         |
| <i>NO<sub>2</sub> (ppb)</i>                                    | 3.97 (0.26)    | 3.94 (0.38)  | 3.98 (0.15)  | 0.08    |
| <i>O<sub>3</sub> (ppb)</i>                                     | 3.97 (0.20)    | 3.95 (0.29)  | 3.99 (0.12)  | 0.06    |
| <i>PM<sub>2.5</sub> (ug/m<sup>3</sup>)</i>                     | 3.98 (0.19)    | 3.96 (0.28)  | 3.99 (0.10)  | 0.09    |
| <i>PM<sub>10</sub> (ug/m<sup>3</sup>)</i>                      | 3.80 (0.41)    | 3.75 (0.51)  | 3.83 (0.34)  | 0.03    |
| <b>Distance to nearest air quality monitoring station (km)</b> |                |              |              |         |
| <i>NO<sub>2</sub> (ppb)</i>                                    | 7.52 (2.60)    | 7.82 (3.04)  | 7.35 (2.29)  | 0.05    |
| <i>O<sub>3</sub> (ppb)</i>                                     | 7.66 (2.53)    | 7.98 (3.03)  | 7.47 (2.18)  | 0.03    |
| <i>PM<sub>2.5</sub> (ug/m<sup>3</sup>)</i>                     | 8.49 (3.34)    | 9.19 (3.91)  | 8.09 (2.89)  | <0.001  |
| <i>PM<sub>10</sub> (ug/m<sup>3</sup>)</i>                      | 14.58 (8.21)   | 14.69 (8.39) | 14.51 (8.11) | 0.79    |

**eTable 3. Distribution of air pollutant concentrations and temperature among 628 participants in the MADRES cohort**

| <b>Period</b>              | <b>Air Pollutant</b>                   | <b>Mean (SD)</b> | <b>Median (Q1, Q3)</b> |
|----------------------------|----------------------------------------|------------------|------------------------|
| Whole pregnancy            | NO <sub>2</sub> (ppb)                  | 16.70 (2.92)     | 16.78 (14.65 - 18.74)  |
|                            | O <sub>3</sub> (ppb)                   | 42.44 (3.77)     | 41.55 (39.99 - 44.31)  |
|                            | PM <sub>2.5</sub> (ug/m <sup>3</sup> ) | 12.05 (1.12)     | 12.03 (11.24 - 12.94)  |
|                            | PM <sub>10</sub> (ug/m <sup>3</sup> )  | 29.13 (4.76)     | 29.73 (25.42 - 33.04)  |
|                            | Temperature (°C)                       | 19.25 (1.33)     | 19.33 (18.44 - 20.11)  |
| 12 weeks before conception | NO <sub>2</sub> (ppb)                  | 17.41 (5.86)     | 17.39 (12.51 - 21.57)  |
|                            | O <sub>3</sub> (ppb)                   | 41.86 (7.53)     | 43.44 (35.49 - 47.43)  |
|                            | PM <sub>2.5</sub> (ug/m <sup>3</sup> ) | 11.91 (2.21)     | 11.67 (10.50 - 12.97)  |
|                            | PM <sub>10</sub> (ug/m <sup>3</sup> )  | 29.43 (5.76)     | 29.25 (24.80 - 33.25)  |
|                            | Temperature (°C)                       | 18.93 (3.27)     | 18.61 (16.17 - 21.82)  |
| 1 <sup>st</sup> trimester  | NO <sub>2</sub> (ppb)                  | 16.90 (6.05)     | 15.53 (11.95 - 21.70)  |
|                            | O <sub>3</sub> (ppb)                   | 42.37 (7.10)     | 44.31 (36.88 - 47.13)  |
|                            | PM <sub>2.5</sub> (ug/m <sup>3</sup> ) | 11.93 (2.30)     | 11.50 (10.50 - 13.11)  |
|                            | PM <sub>10</sub> (ug/m <sup>3</sup> )  | 29.41 (5.94)     | 29.47 (24.68 - 33.01)  |
|                            | Temperature (°C)                       | 19.02 (3.33)     | 18.84 (16.49 - 21.85)  |
| 2 <sup>nd</sup> trimester  | NO <sub>2</sub> (ppb)                  | 16.44 (5.79)     | 15.34 (11.71 - 20.83)  |
|                            | O <sub>3</sub> (ppb)                   | 42.71 (7.05)     | 44.35 (36.86 - 47.06)  |
|                            | PM <sub>2.5</sub> (ug/m <sup>3</sup> ) | 12.07 (2.20)     | 11.94 (10.71 - 13.27)  |
|                            | PM <sub>10</sub> (ug/m <sup>3</sup> )  | 29.18 (5.90)     | 29.63 (24.36 - 33.27)  |
|                            | Temperature (°C)                       | 19.40 (3.21)     | 19.28 (16.59 - 22.33)  |
| 3 <sup>rd</sup> trimester  | NO <sub>2</sub> (ppb)                  | 16.78 (5.92)     | 15.74 (11.73 - 21.50)  |
|                            | O <sub>3</sub> (ppb)                   | 42.15 (7.80)     | 43.35 (36.06 - 47.30)  |
|                            | PM <sub>2.5</sub> (ug/m <sup>3</sup> ) | 12.15 (2.32)     | 12.04 (10.61 - 13.40)  |
|                            | PM <sub>10</sub> (ug/m <sup>3</sup> )  | 28.71 (6.42)     | 28.94 (23.94 - 33.20)  |
|                            | Temperature (°C)                       | 19.31 (3.37)     | 19.19 (16.47 - 22.23)  |

eTable 4a. Population characteristics and birth weight z-scores (BWZ) according to individual and neighborhood level stressors

| Population characteristics          |                                        | CES          |              |        | Missing      | PSS          |              |       |
|-------------------------------------|----------------------------------------|--------------|--------------|--------|--------------|--------------|--------------|-------|
|                                     |                                        | Low          | High         | P      |              | Low          | High         | P     |
| <b>N</b>                            |                                        | 229          | 394          |        | 85           | 411          | 132          |       |
| <b>BWZ</b>                          |                                        | -0.11 (1.38) | -0.05 (6.99) | 0.51   | -0.20 (1.55) | -0.01 (1.91) | -0.17 (1.55) | 0.15  |
| <b>Enrollment timepoint</b>         |                                        |              |              |        |              |              |              |       |
|                                     | Regular Entry (<20 weeks)              | 170 (73.91)  | 291 (73.48)  | 0.06   | 43 (50.59)   | 323 (78.59)  | 95 (71.97)   | <.001 |
|                                     | Late Entry (20-30 weeks)               | 60 (26.09)   | 105 (26.52)  |        | 42 (49.41)   | 88 (21.41)   | 37 (28.03)   |       |
| <b>Language preference</b>          |                                        |              |              |        |              |              |              |       |
|                                     | English                                | 173 (75.22)  | 250 (63.13)  | 0.01   | 62 (72.94)   | 277 (67.40)  | 84 (63.64)   | <.001 |
|                                     | Spanish                                | 56 (24.35)   | 145 (36.62)  |        | 21 (24.71)   | 134 (32.60)  | 48 (36.36)   |       |
| <b>Maternal country of origin</b>   |                                        |              |              |        |              |              |              |       |
|                                     | Latin America                          | 71 (30.87)   | 152 (38.38)  | 0.10   | 0 (0.00)     | 166 (40.39)  | 59 (44.70)   | <.001 |
|                                     | US                                     | 107 (46.52)  | 173 (43.69)  |        | 1 (1.18)     | 215 (52.31)  | 64 (48.48)   |       |
|                                     | Others/unknown <sup>1</sup>            | 52 (22.61)   | 71 (17.93)   |        | 84 (98.82)   | 30 (7.30)    | 9 (6.82)     |       |
| <b>Maternal ethnicity</b>           |                                        |              |              |        |              |              |              |       |
|                                     | Non-Hispanic                           | 145 (63.04)  | 316 (79.80)  | <.001  | 43 (50.59)   | 320 (77.86)  | 100 (75.76)  | <.001 |
|                                     | Hispanic                               | 74 (32.17)   | 56 (14.14)   |        | 11 (12.94)   | 87 (21.17)   | 32 (24.24)   |       |
| <b>Cohabitation status</b>          |                                        |              |              |        |              |              |              |       |
|                                     | Cohabitate with spouse or partner      | 133 (57.83)  | 238 (60.10)  | 0.74   | 1 (1.18)     | 287 (69.83)  | 85 (64.39)   | <.001 |
|                                     | Non-cohabitating                       | 52 (22.61)   | 79 (19.95)   |        | 0 (0.00)     | 95 (23.11)   | 36 (27.27)   |       |
|                                     | Missing/decline to respond             | 45 (19.57)   | 79 (19.95)   |        | 84 (98.82)   | 29 (7.06)    | 11 (8.33)    |       |
| <b>Annual household income (\$)</b> |                                        |              |              |        |              |              |              |       |
|                                     | <15,000                                | 33 (14.35)   | 76 (19.19)   | <.001  | 10 (11.76)   | 66 (16.06)   | 34 (25.76)   | <.001 |
|                                     | 15,000-29,000                          | 54 (23.48)   | 91 (22.98)   |        | 9 (10.59)    | 110 (26.76)  | 27 (20.45)   |       |
|                                     | ≥30,000                                | 72 (31.30)   | 66 (16.67)   |        | 6 (7.06)     | 100 (24.33)  | 32 (24.24)   |       |
|                                     | Unknown                                | 60 (26.09)   | 140 (35.35)  |        | 30 (35.29)   | 131 (31.87)  | 39 (29.55)   |       |
|                                     | Missing                                | 11 (4.78)    | 23 (5.81)    |        | 30 (35.29)   | 4 (0.97)     | 0 (0.00)     |       |
| <b>Education</b>                    |                                        |              |              |        |              |              |              |       |
|                                     | Below 12th grade                       | 39 (16.96)   | 111 (28.03)  | <.001  | 19 (22.35)   | 92 (22.38)   | 39 (29.55)   | <.001 |
|                                     | Completed 12 <sup>th</sup> grade       | 53 (23.04)   | 122 (30.81)  |        | 19 (22.35)   | 125 (30.41)  | 33 (25.00)   |       |
|                                     | Some College                           | 70 (30.43)   | 94 (23.74)   |        | 15 (17.65)   | 112 (27.25)  | 37 (28.03)   |       |
|                                     | College or above                       | 57 (24.78)   | 46 (11.62)   |        | 2 (2.35)     | 78 (18.98)   | 23 (17.42)   |       |
|                                     | Missing                                | 11 (4.78)    | 23 (5.81)    |        | 30 (35.29)   | 4 (0.97)     | 0 (0.00)     |       |
| <b>Pre-pregnancy BMI category</b>   |                                        |              |              |        |              |              |              |       |
|                                     | Normal/underweight                     | 84 (36.52)   | 120 (30.30)  | 0.21   | 25 (29.41)   | 128 (31.14)  | 51 (38.64)   | <.001 |
|                                     | Overweight                             | 67 (29.13)   | 125 (31.57)  |        | 22 (25.88)   | 137 (33.33)  | 35 (26.52)   |       |
|                                     | Obese                                  | 77 (33.48)   | 150 (37.88)  |        | 35 (41.18)   | 146 (35.52)  | 46 (34.85)   |       |
| <b>Birth order</b>                  |                                        |              |              |        |              |              |              |       |
|                                     | First born                             | 79 (34.35)   | 112 (28.28)  | 0.47   | 1 (1.18)     | 148 (36.01)  | 42 (31.82)   | <.001 |
|                                     | Second born                            | 61 (26.52)   | 105 (26.52)  |        | 0 (0.00)     | 129 (31.39)  | 38 (28.79)   |       |
|                                     | Third or later born                    | 52 (22.61)   | 114 (28.79)  |        | 0 (0.00)     | 120 (29.20)  | 47 (35.61)   |       |
|                                     | Missing                                | 38 (16.52)   | 65 (16.41)   |        | 84 (98.82)   | 14 (3.41)    | 5 (3.79)     |       |
| <b>Newborn sex</b>                  |                                        |              |              |        |              |              |              |       |
|                                     | Female                                 | 122 (53.04)  | 199 (50.25)  | 0.80   | 44 (51.76)   | 208 (50.61)  | 70 (53.03)   | 0.89  |
|                                     | Male                                   | 108 (46.96)  | 197 (49.75)  |        | 41 (48.24)   | 203 (49.39)  | 62 (46.97)   |       |
| <b>12 weeks preconception</b>       |                                        |              |              |        |              |              |              |       |
|                                     | PM <sub>2.5</sub> (ug/m <sup>3</sup> ) | 11.88 (2.29) | 11.93 (2.21) | 0.84   | 12.31 (2.11) | 11.88 (2.24) | 11.75 (2.28) | 0.18  |
|                                     | PM <sub>10</sub> (ug/m <sup>3</sup> )  | 29.17 (6.85) | 29.57 (5.64) | 0.41   | 29.91 (6.12) | 29.46 (5.66) | 29.03 (5.88) | 0.55  |
|                                     | NO <sub>2</sub> (ppb)                  | 16.22 (5.75) | 18.11 (5.82) | <.0001 | 17.97 (5.97) | 17.27 (5.83) | 17.51 (5.95) | 0.59  |
|                                     | O <sub>3</sub> (ppb)                   | 42.60 (7.66) | 41.43 (7.43) | 0.06   | 41.52 (7.44) | 42.00 (7.59) | 41.65 (7.44) | 0.82  |
| <b>1st trimester</b>                |                                        |              |              |        |              |              |              |       |
|                                     | PM <sub>2.5</sub> (ug/m <sup>3</sup> ) | 11.89 (2.25) | 11.96 (2.34) | 0.70   | 12.21 (2.45) | 11.94 (2.33) | 11.73 (2.12) | 0.33  |
|                                     | PM <sub>10</sub> (ug/m <sup>3</sup> )  | 29.11 (6.28) | 29.59 (5.74) | 0.33   | 29.75 (6.24) | 29.51 (5.78) | 28.89 (6.25) | 0.51  |
|                                     | NO <sub>2</sub> (ppb)                  | 15.51 (5.61) | 17.72 (6.16) | <.001  | 18.01 (6.43) | 16.70 (6.85) | 16.79 (5.78) | 0.20  |
|                                     | O <sub>3</sub> (ppb)                   | 43.75 (7.33) | 41.56 (6.84) | <.001  | 41.15 (7.53) | 42.46 (7.13) | 42.87 (7.64) | 0.21  |
| <b>2nd trimester</b>                |                                        |              |              |        |              |              |              |       |
|                                     | PM <sub>2.5</sub> (ug/m <sup>3</sup> ) | 12.14 (2.19) | 12.02 (2.23) | 0.53   | 11.92 (2.29) | 12.06 (2.19) | 12.18 (2.19) | 0.69  |

|                        |                                               |              |              |       |              |              |              |      |
|------------------------|-----------------------------------------------|--------------|--------------|-------|--------------|--------------|--------------|------|
|                        | <i>PM</i> <sub>10</sub> (ug/m <sup>3</sup> )  | 29.35 (6.17) | 29.08 (5.74) | 0.59  | 29.24 (5.64) | 29.10 (6.71) | 29.36 (5.74) | 0.91 |
|                        | <i>NO</i> <sub>2</sub> (ppb)                  | 15.94 (5.75) | 16.74 (5.79) | 0.10  | 15.79 (5.98) | 16.39 (5.76) | 17.00 (5.93) | 0.32 |
|                        | <i>O</i> <sub>3</sub> (ppb)                   | 43.33 (7.53) | 42.35 (6.76) | 0.09  | 42.78 (6.63) | 42.66 (7.14) | 42.85 (7.11) | 0.96 |
| <b>3rd trimester</b>   |                                               |              |              |       |              |              |              |      |
|                        | <i>PM</i> <sub>2.5</sub> (ug/m <sup>3</sup> ) | 11.99 (2.24) | 12.23 (2.39) | 0.22  | 12.28 (2.34) | 12.11 (2.38) | 12.16 (2.15) | 0.83 |
|                        | <i>PM</i> <sub>10</sub> (ug/m <sup>3</sup> )  | 28.60 (6.39) | 28.78 (6.44) | 0.75  | 29.65 (6.05) | 28.48 (6.47) | 28.84 (6.48) | 0.31 |
|                        | <i>NO</i> <sub>2</sub> (ppb)                  | 16.15 (5.67) | 17.14 (6.24) | 0.05  | 15.76 (6.17) | 16.83 (5.97) | 17.26 (5.53) | 0.19 |
|                        | <i>O</i> <sub>3</sub> (ppb)                   | 42.81 (8.57) | 41.76 (7.39) | 0.11  | 43.11 (6.58) | 41.95 (7.72) | 42.17 (8.72) | 0.47 |
| <b>Whole pregnancy</b> |                                               |              |              |       |              |              |              |      |
|                        | <i>PM</i> <sub>2.5</sub> (ug/m <sup>3</sup> ) | 12.01 (1.19) | 12.07 (1.48) | 0.49  | 12.13 (1.54) | 12.04 (1.13) | 12.03 (1.17) | 0.76 |
|                        | <i>PM</i> <sub>10</sub> (ug/m <sup>3</sup> )  | 29.08 (4.78) | 29.15 (4.76) | 0.86  | 29.54 (4.58) | 29.06 (4.85) | 29.08 (4.63) | 0.70 |
|                        | <i>NO</i> <sub>2</sub> (ppb)                  | 15.85 (3.14) | 17.19 (2.73) | <.001 | 16.54 (3.15) | 16.64 (2.91) | 16.99 (2.85) | 0.42 |
|                        | <i>O</i> <sub>3</sub> (ppb)                   | 43.31 (4.11) | 41.94 (3.47) | <.001 | 42.32 (3.38) | 42.39 (3.88) | 42.68 (3.68) | 0.71 |

**eTable 4b. Population characteristics and birth weight z-scores (BWZ) according to the joint distribution of individual and neighborhood level stressors**

| Population characteristics          |                                        | Joint distribution by PSS and CES |                    |                    |                     | P     |
|-------------------------------------|----------------------------------------|-----------------------------------|--------------------|--------------------|---------------------|-------|
|                                     |                                        | Low CES + low PSS                 | High CES + low PSS | Low CES + high PSS | High CES + high PSS |       |
| <b>N</b>                            |                                        | 150                               | 260                | 49                 | 82                  |       |
| <b>BWZ</b>                          |                                        | -0.05 (1.85)                      | 0.00 (4.99)        | -0.20 (1.14)       | -0.15 (1.71)        | 0.44  |
| <b>Enrollment timepoint</b>         |                                        |                                   |                    |                    |                     |       |
|                                     | Regular Entry (<20 weeks)              | 116 (77.33)                       | 207 (79.62)        | 39 (79.59)         | 56 (68.29)          | <.001 |
|                                     | Late Entry (20-30 weeks)               | 34 (22.67)                        | 53 (20.38)         | 10 (20.41)         | 26 (31.71)          |       |
| <b>Language preference</b>          |                                        |                                   |                    |                    |                     |       |
|                                     | English                                | 113 (75.33)                       | 164 (63.08)        | 35 (71.43)         | 49 (59.76)          | <.001 |
|                                     | Spanish                                | 37 (24.67)                        | 96 (36.92)         | 14 (28.57)         | 33 (40.24)          |       |
| <b>Maternal country of origin</b>   |                                        |                                   |                    |                    |                     |       |
|                                     | Latin America                          | 51 (34.00)                        | 36 (13.85)         | 18 (36.73)         | 14 (17.07)          | <.001 |
|                                     | US                                     | 42 (28.00)                        | 104 (40.00)        | 12 (24.49)         | 23 (28.05)          |       |
|                                     | Others/unknown <sup>1</sup>            | 53 (35.33)                        | 112 (43.08)        | 18 (36.73)         | 41 (50.00)          |       |
| <b>Maternal ethnicity</b>           |                                        |                                   |                    |                    |                     |       |
|                                     | Non-Hispanic                           | 51 (34.00)                        | 36 (13.85)         | 18 (36.73)         | 14 (17.07)          | <.001 |
|                                     | Hispanic                               | 96 (64.00)                        | 223 (85.77)        | 31 (63.27)         | 68 (82.93)          |       |
|                                     | Missing                                |                                   |                    |                    |                     |       |
| <b>Cohabitation status</b>          |                                        |                                   |                    |                    |                     |       |
|                                     | Cohabitate with spouse or partner      | 104 (69.33)                       | 182 (70.00)        | 29 (59.18)         | 55 (67.07)          | <.001 |
|                                     | Non-cohabitating                       | 36 (24.00)                        | 59 (22.69)         | 16 (32.65)         | 20 (24.39)          |       |
|                                     | Missing/decline to respond             | 10 (6.67)                         | 19 (7.31)          | 4 (8.16)           | 7 (8.54)            |       |
| <b>Annual household income (\$)</b> |                                        |                                   |                    |                    |                     |       |
|                                     | <15,000                                | 16 (10.67)                        | 50 (19.23)         | 13 (26.53)         | 20 (24.39)          | <.001 |
|                                     | 15,000-29,000                          | 40 (26.67)                        | 69 (26.54)         | 10 (20.41)         | 17 (20.73)          |       |
|                                     | ≥30,000                                | 52 (34.67)                        | 48 (18.46)         | 16 (32.65)         | 16 (19.51)          |       |
|                                     | Unknown                                | 39 (26.00)                        | 92 (35.38)         | 10 (20.41)         | 29 (35.37)          |       |
|                                     | Missing                                | 3 (2.00)                          | 1 (0.38)           | 0 (0.00)           | 0 (0.00)            |       |
| <b>Education</b>                    |                                        |                                   |                    |                    |                     |       |
|                                     | Below 12th grade                       | 23 (15.33)                        | 69 (26.54)         | 10 (20.41)         | 29 (35.37)          | <.001 |
|                                     | Completed 12 <sup>th</sup> grade       | 38 (25.33)                        | 86 (33.08)         | 10 (20.41)         | 22 (26.83)          |       |
|                                     | Some College                           | 41 (27.33)                        | 71 (27.31)         | 18 (36.73)         | 19 (23.17)          |       |
|                                     | College or above                       | 45 (30.00)                        | 33 (12.69)         | 11 (22.45)         | 12 (14.63)          |       |
|                                     | Missing                                | 3 (2.00)                          | 1 (0.38)           | 0 (0.00)           | 0 (0.00)            |       |
| <b>Pre-pregnancy BMI category</b>   |                                        |                                   |                    |                    |                     |       |
|                                     | Normal/underweight                     | 49 (32.67)                        | 79 (30.38)         | 23 (46.94)         | 28 (34.15)          | 0.01  |
|                                     | Overweight                             | 52 (34.67)                        | 84 (32.31)         | 9 (18.37)          | 25 (30.49)          |       |
|                                     | Obese                                  | 49 (32.67)                        | 97 (37.31)         | 17 (34.69)         | 29 (35.37)          |       |
| <b>Birth order</b>                  |                                        |                                   |                    |                    |                     |       |
|                                     | First born                             | 62 (41.33)                        | 86 (33.08)         | 17 (34.69)         | 25 (30.49)          | <.001 |
|                                     | Second born                            | 47 (31.33)                        | 81 (31.15)         | 14 (28.57)         | 24 (29.27)          |       |
|                                     | Third or later born                    | 35 (23.33)                        | 85 (32.69)         | 17 (34.69)         | 29 (35.37)          |       |
|                                     | Missing                                | 6 (4.00)                          | 8 (3.08)           | 1 (2.04)           | 4 (4.88)            |       |
| <b>Newborn sex</b>                  |                                        |                                   |                    |                    |                     |       |
|                                     | Female                                 | 76 (50.67)                        | 131 (50.38)        | 29 (59.18)         | 41 (50.00)          | 0.85  |
|                                     | Male                                   | 74 (49.33)                        | 129 (49.62)        | 20 (40.82)         | 41 (50.00)          |       |
| <b>12 weeks preconception</b>       |                                        |                                   |                    |                    |                     |       |
|                                     | PM <sub>2.5</sub> (ug/m <sup>3</sup> ) | 11.84 (2.11)                      | 11.91 (2.25)       | 11.58 (2.85)       | 11.85 (2.42)        | 0.83  |
|                                     | PM <sub>10</sub> (ug/m <sup>3</sup> )  | 29.13 (5.85)                      | 29.64 (5.55)       | 28.65 (5.95)       | 29.27 (5.86)        | 0.65  |
|                                     | NO <sub>2</sub> (ppb)                  | 15.94 (5.68)                      | 18.03 (5.79)       | 16.34 (5.25)       | 18.22 (6.18)        | 0.00  |
|                                     | O <sub>3</sub> (ppb)                   | 42.93 (7.81)                      | 41.45 (7.43)       | 43.12 (7.31)       | 40.75 (7.43)        | 0.08  |
| <b>1st trimester</b>                |                                        |                                   |                    |                    |                     |       |
|                                     | PM <sub>2.5</sub> (ug/m <sup>3</sup> ) | 11.97 (2.32)                      | 11.92 (2.34)       | 11.87 (2.25)       | 11.64 (2.25)        | 0.75  |
|                                     | PM <sub>10</sub> (ug/m <sup>3</sup> )  | 29.58 (6.48)                      | 29.46 (5.41)       | 28.40 (6.84)       | 29.20 (5.88)        | 0.65  |
|                                     | NO <sub>2</sub> (ppb)                  | 15.57 (5.85)                      | 17.36 (6.87)       | 15.79 (5.47)       | 17.39 (5.91)        | 0.01  |
|                                     | O <sub>3</sub> (ppb)                   | 43.85 (7.24)                      | 41.65 (6.96)       | 43.88 (8.66)       | 42.26 (5.73)        | 0.01  |



|                        |                                            |              |              |               |              |       |
|------------------------|--------------------------------------------|--------------|--------------|---------------|--------------|-------|
| <b>2nd trimester</b>   |                                            |              |              |               |              |       |
|                        | <i>PM<sub>2.5</sub> (ug/m<sup>3</sup>)</i> | 12.17 (2.12) | 12.00 (2.22) | 12.17 (2.47)  | 12.18 (2.72) | 0.83  |
|                        | <i>PM<sub>10</sub> (ug/m3)</i>             | 29.34 (6.16) | 28.97 (5.93) | 29.81 (7.13)  | 29.09 (4.76) | 0.80  |
|                        | <i>NO<sub>2</sub> (ppb)</i>                | 16.17 (5.73) | 16.53 (5.69) | 16.79 (5.88)  | 17.12 (5.99) | 0.67  |
|                        | <i>O<sub>3</sub> (ppb)</i>                 | 42.91 (7.66) | 42.51 (6.83) | 44.18 (7.42)  | 42.06 (6.83) | 0.38  |
| <b>3rd trimester</b>   |                                            |              |              |               |              |       |
|                        | <i>PM<sub>2.5</sub> (ug/m<sup>3</sup>)</i> | 11.89 (2.23) | 12.24 (2.47) | 12.12 (2.12)  | 12.18 (2.17) | 0.54  |
|                        | <i>PM<sub>10</sub> (ug/m3)</i>             | 28.21 (6.59) | 28.64 (6.68) | 29.46 (7.29)  | 28.47 (5.97) | 0.70  |
|                        | <i>NO<sub>2</sub> (ppb)</i>                | 16.01 (5.50) | 17.31 (6.19) | 17.09 (5.85)  | 17.37 (5.37) | 0.16  |
|                        | <i>O<sub>3</sub> (ppb)</i>                 | 42.54 (8.12) | 41.62 (7.48) | 43.27 (16.51) | 41.51 (7.44) | 0.42  |
| <b>Whole pregnancy</b> |                                            |              |              |               |              |       |
|                        | <i>PM<sub>2.5</sub> (ug/m<sup>3</sup>)</i> | 12.01 (1.16) | 12.06 (1.11) | 12.06 (1.45)  | 12.00 (9.97) | 0.98  |
|                        | <i>PM<sub>10</sub> (ug/m3)</i>             | 29.13 (4.81) | 29.02 (4.87) | 29.28 (5.34)  | 28.95 (4.17) | 0.98  |
|                        | <i>NO<sub>2</sub> (ppb)</i>                | 15.91 (3.81) | 17.06 (2.76) | 16.52 (3.09)  | 17.27 (2.63) | <.001 |
|                        | <i>O<sub>3</sub> (ppb)</i>                 | 43.11 (4.49) | 41.97 (3.74) | 43.79 (4.36)  | 42.02 (3.44) | <.001 |

**eTable 5. Average weekly effect estimation of air pollution exposure in identified sensitive windows on birth weight**

| Air pollutant     | Subgroup          | Sensitive window (gestational week) <sup>a</sup> | Average difference in birthweight (gram, 95% CI) <sup>b</sup> |
|-------------------|-------------------|--------------------------------------------------|---------------------------------------------------------------|
| PM2.5             | Overall           | 14-22                                            | -9.5 (-10.4, -8.6)                                            |
|                   | High-PSS          | 10-14                                            | -15.4 (-18.4, -12.4)                                          |
|                   | High-CES          | 10-22                                            | -15.4 (-16.2, -14.5)                                          |
|                   | High-PSS/High-CES | 4-20                                             | -34.0 (-35.7, -32.4)                                          |
| PM10              | High-PSS          | 9-12                                             | -19.2 (-28.6, -9.9)                                           |
|                   | High-CES          | 5-17                                             | -16.7 (-17.6, -15.8)                                          |
|                   | High-CES          | 25-32                                            | 18.5 (16.6, 20.3)                                             |
|                   | Low-PSS/Low-CES   | 21-24                                            | -17.9 (-22.2, -13.6)                                          |
|                   | Low-PSS/Low-CES   | 31-32                                            | -23.9 (-35.0, -12.8)                                          |
|                   | Low-PSS/High-CES  | 8-10                                             | -14.2 (-18.8, -9.7)                                           |
| NO2               | High-PSS/High-CES | 9-14                                             | -39.4 (-45.4, -33.4)                                          |
|                   | Overall           | 9-14                                             | -13.5 (-15.6, -11.5)                                          |
|                   | High-PSS          | 8-9                                              | -19.2 (-28.6, -9.9)                                           |
|                   | High-PSS/Low-CES  | 5-8                                              | -35.5 (-43.6, -27.4)                                          |
|                   | High-PSS/Low-CES  | 31                                               | -43.5 (-84.8, -2.3)                                           |
|                   | High-PSS/High-CES | 9-14                                             | -40.4 (-47.4, -33.3)                                          |
|                   | High-PSS/High-CES | 23-26                                            | 63.2 (47.8, 78.5)                                             |
| High-PSS/High-CES | 33-36             | -117.6 (-141.0, -94.2)                           |                                                               |

Note: a: sensitive windows were identified from DLM models (visualized in Figures 1-4). All model adjusted for weekly temperature, maternal age, education, maternal pre-pregnancy body mass index, maternal ethnicity and nativity, marital status, and birth order. b: difference in birthweight was estimated assuming 1 unit of BWZ=450 grams of birthweight. Effect estimation was based on per IQR increases in each air pollutant (i.e., 4 µg/m<sup>3</sup>, 12 µg/m<sup>3</sup>, 11 ppb, and 15 ppb for PM<sub>2.5</sub>, and PM<sub>10</sub>, NO<sub>2</sub>, and O<sub>3</sub>, respectively).

**eTable 6: Population characteristics and birth weight z-scores (BWZ) according to preterm birth status among all participants in the MADRES cohort (2015-2021)**

| Population characteristics          |                                        | PTB         |            |             |
|-------------------------------------|----------------------------------------|-------------|------------|-------------|
|                                     |                                        | No          | Yes        | P           |
| <b>N</b>                            |                                        | 628         | 72         |             |
| <b>Overall</b>                      |                                        | -0.07±1.73  | 0.18±1.48  | 0.04        |
| <b>Enrollment timepoint</b>         |                                        |             |            |             |
|                                     | Regular Entry (<20 weeks)              | 461 (73.41) | 58 (80.56) | 0.19        |
|                                     | Late Entry (20-30 weeks)               | 167 (26.59) | 14 (19.44) |             |
| <b>Language preference</b>          |                                        |             |            |             |
|                                     | English                                | 423 (67.36) | 49 (68.06) | 0.89        |
|                                     | Spanish                                | 203 (32.32) | 23 (31.94) |             |
| <b>Maternal country of origin</b>   |                                        |             |            |             |
|                                     | Latin America                          | 225 (35.83) | 20 (27.78) | 0.40        |
|                                     | US                                     | 280 (44.59) | 36 (50.00) |             |
|                                     | Others/unknown <sup>1</sup>            | 123 (19.59) | 16 (22.22) |             |
| <b>Maternal ethnicity</b>           |                                        |             |            |             |
|                                     | Non-Hispanic                           | 130 (20.70) | 10 (13.89) | 0.29        |
|                                     | Hispanic                               | 463 (73.73) | 56 (77.78) |             |
|                                     | Missing                                |             |            |             |
| <b>Cohabitation status</b>          |                                        |             |            |             |
|                                     | Cohabitate with spouse or partner      | 373 (59.39) | 40 (55.56) | 0.81        |
|                                     | Non-cohabitating                       | 131 (20.86) | 17 (23.61) |             |
|                                     | Missing/decline to respond             | 124 (19.75) | 15 (20.83) |             |
| <b>Annual household income (\$)</b> |                                        |             |            |             |
|                                     | <15,000                                | 110 (17.52) | 23 (31.94) | <b>0.02</b> |
|                                     | 15,000-29,000                          | 146 (23.25) | 17 (23.61) |             |
|                                     | ≥30,000                                | 138 (21.97) | 9 (12.50)  |             |
|                                     | Unknown                                | 200 (31.85) | 17 (23.61) |             |
|                                     | Missing                                | 34 (5.41)   | 6 (8.33)   |             |
| <b>Education</b>                    |                                        |             |            |             |
|                                     | Below 12th grade                       | 150 (23.89) | 19 (26.39) | <b>0.04</b> |
|                                     | Completed 12 <sup>th</sup> grade       | 177 (28.18) | 28 (38.89) |             |
|                                     | Some College                           | 164 (26.11) | 13 (18.06) |             |
|                                     | College or above                       | 103 (16.40) | 5 (6.94)   |             |
|                                     | Missing                                | 34 (5.41)   | 7 (9.72)   |             |
| <b>Pre-pregnancy BMI category</b>   |                                        |             |            |             |
|                                     | Normal/underweight                     | 204 (32.48) | 21 (29.17) | 0.83        |
|                                     | Overweight                             | 194 (30.89) | 22 (30.56) |             |
|                                     | Obese                                  | 227 (36.15) | 29 (40.28) |             |
| <b>Birth order</b>                  |                                        |             |            |             |
|                                     | First born                             | 191 (30.41) | 17 (23.61) | 0.51        |
|                                     | Second born                            | 167 (26.59) | 19 (26.39) |             |
|                                     | Third or later born                    | 167 (26.59) | 20 (27.78) |             |
|                                     | Missing                                | 103 (16.40) | 16 (22.22) |             |
| <b>Newborn sex</b>                  |                                        |             |            |             |
|                                     | Female                                 | 322 (51.27) | 31 (43.06) | 0.19        |
|                                     | Male                                   | 306 (48.73) | 41 (56.94) |             |
| <b>12 weeks preconception</b>       |                                        |             |            |             |
|                                     | PM <sub>2.5</sub> (ug/m <sup>3</sup> ) | 11.91±2.21  | 11.84±1.76 | 0.81        |
|                                     | PM <sub>10</sub> (ug/m <sup>3</sup> )  | 29.43±5.76  | 29.97±5.48 | 0.45        |
|                                     | NO <sub>2</sub> (ppb)                  | 17.41±5.86  | 16.01±5.25 | <b>0.05</b> |
|                                     | O <sub>3</sub> (ppb)                   | 41.86±7.53  | 44.19±8.33 | <b>0.01</b> |
| <b>1st trimester</b>                |                                        |             |            |             |
|                                     | PM <sub>2.5</sub> (ug/m <sup>3</sup> ) | 11.93±2.34  | 12.14±2.11 | 0.47        |
|                                     | PM <sub>10</sub> (ug/m <sup>3</sup> )  | 29.41±5.94  | 29.83±5.97 | 0.57        |
|                                     | NO <sub>2</sub> (ppb)                  | 16.89±6.95  | 17.24±5.54 | 0.65        |
|                                     | O <sub>3</sub> (ppb)                   | 42.37±7.11  | 42.56±7.61 | 0.83        |

|                        |                                            |            |            |             |
|------------------------|--------------------------------------------|------------|------------|-------------|
| <b>2nd trimester</b>   |                                            |            |            |             |
|                        | <i>PM<sub>2.5</sub> (ug/m<sup>3</sup>)</i> | 12.06±2.26 | 12.31±2.62 | 0.39        |
|                        | <i>PM<sub>10</sub> (ug/m<sup>3</sup>)</i>  | 29.17±5.99 | 29.67±8.55 | 0.52        |
|                        | <i>NO<sub>2</sub> (ppb)</i>                | 16.44±5.79 | 17.96±6.15 | <b>0.04</b> |
|                        | <i>O<sub>3</sub> (ppb)</i>                 | 42.71±7.45 | 40.90±7.35 | <b>0.04</b> |
| <b>3rd trimester</b>   |                                            |            |            |             |
|                        | <i>PM<sub>2.5</sub> (ug/m<sup>3</sup>)</i> | 12.15±2.32 | 12.17±3.68 | 0.92        |
|                        | <i>PM<sub>10</sub> (ug/m<sup>3</sup>)</i>  | 28.71±6.42 | 28.77±6.87 | 0.95        |
|                        | <i>NO<sub>2</sub> (ppb)</i>                | 16.78±5.92 | 16.90±6.23 | 0.87        |
|                        | <i>O<sub>3</sub> (ppb)</i>                 | 42.15±7.82 | 41.47±8.12 | 0.49        |
| <b>Whole pregnancy</b> |                                            |            |            |             |
|                        | <i>PM<sub>2.5</sub> (ug/m<sup>3</sup>)</i> | 12.05±1.12 | 12.22±1.43 | 0.23        |
|                        | <i>PM<sub>10</sub> (ug/m<sup>3</sup>)</i>  | 29.13±4.76 | 29.52±5.52 | 0.51        |
|                        | <i>NO<sub>2</sub> (ppb)</i>                | 16.70±2.92 | 17.48±3.32 | <b>0.04</b> |
|                        | <i>O<sub>3</sub> (ppb)</i>                 | 42.44±3.77 | 41.64±3.26 | 0.08        |

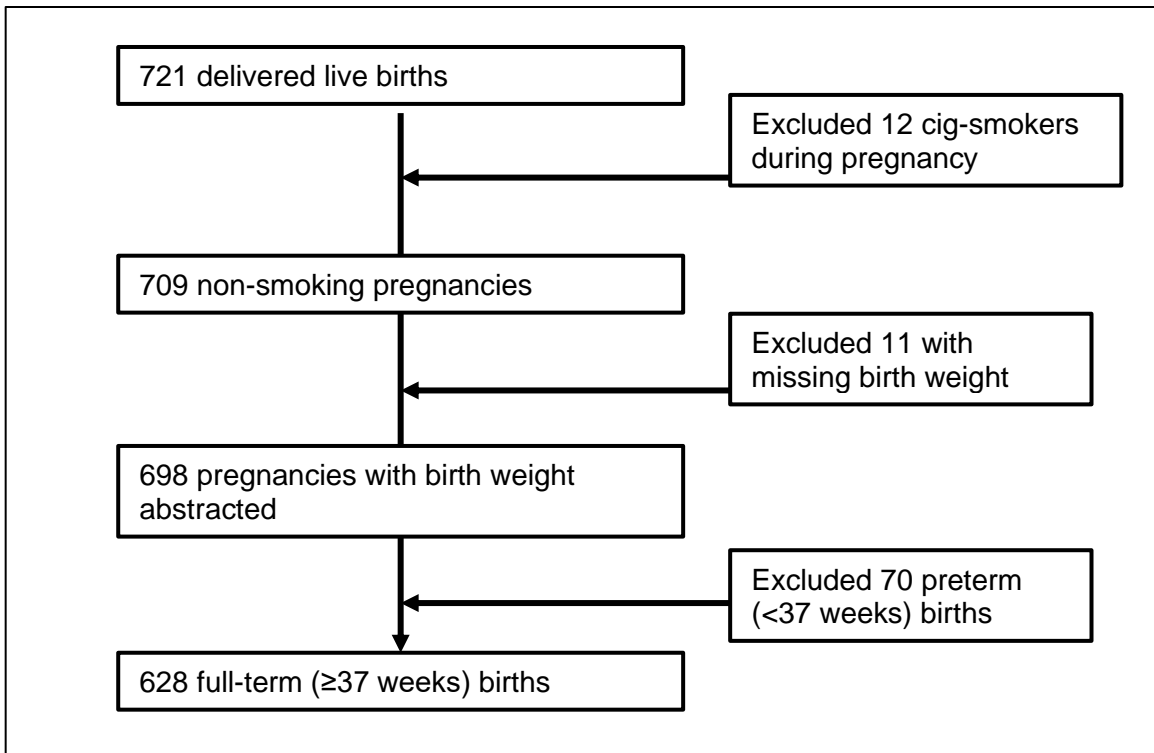

**eFigure 1. Flow chart of participants included in this analysis from the MADRES cohort.**

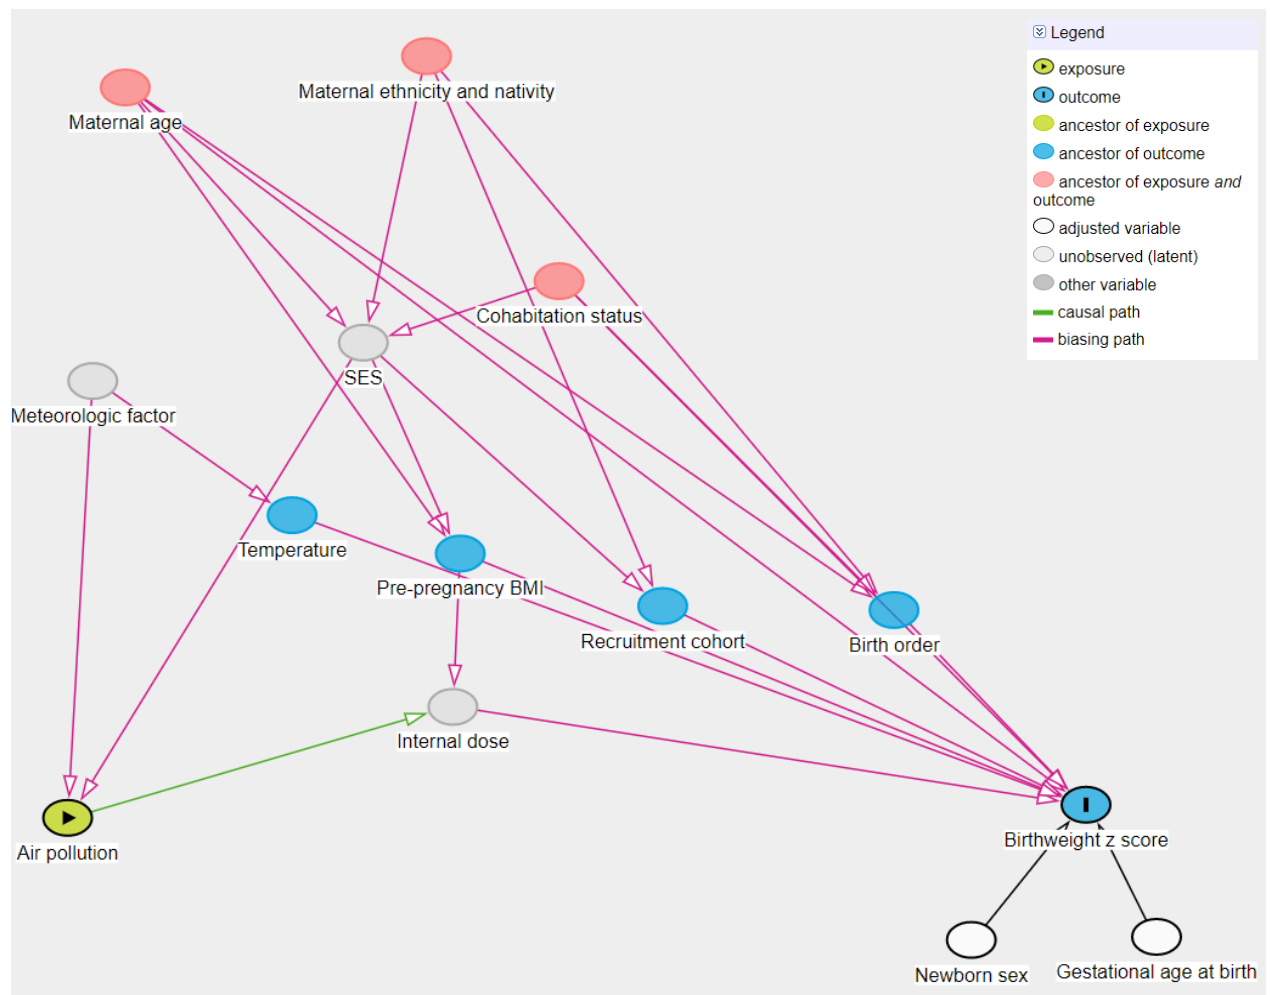

**eFigure 2. Theoretical causal structure underlying the association of air pollution exposure with BWZ.**

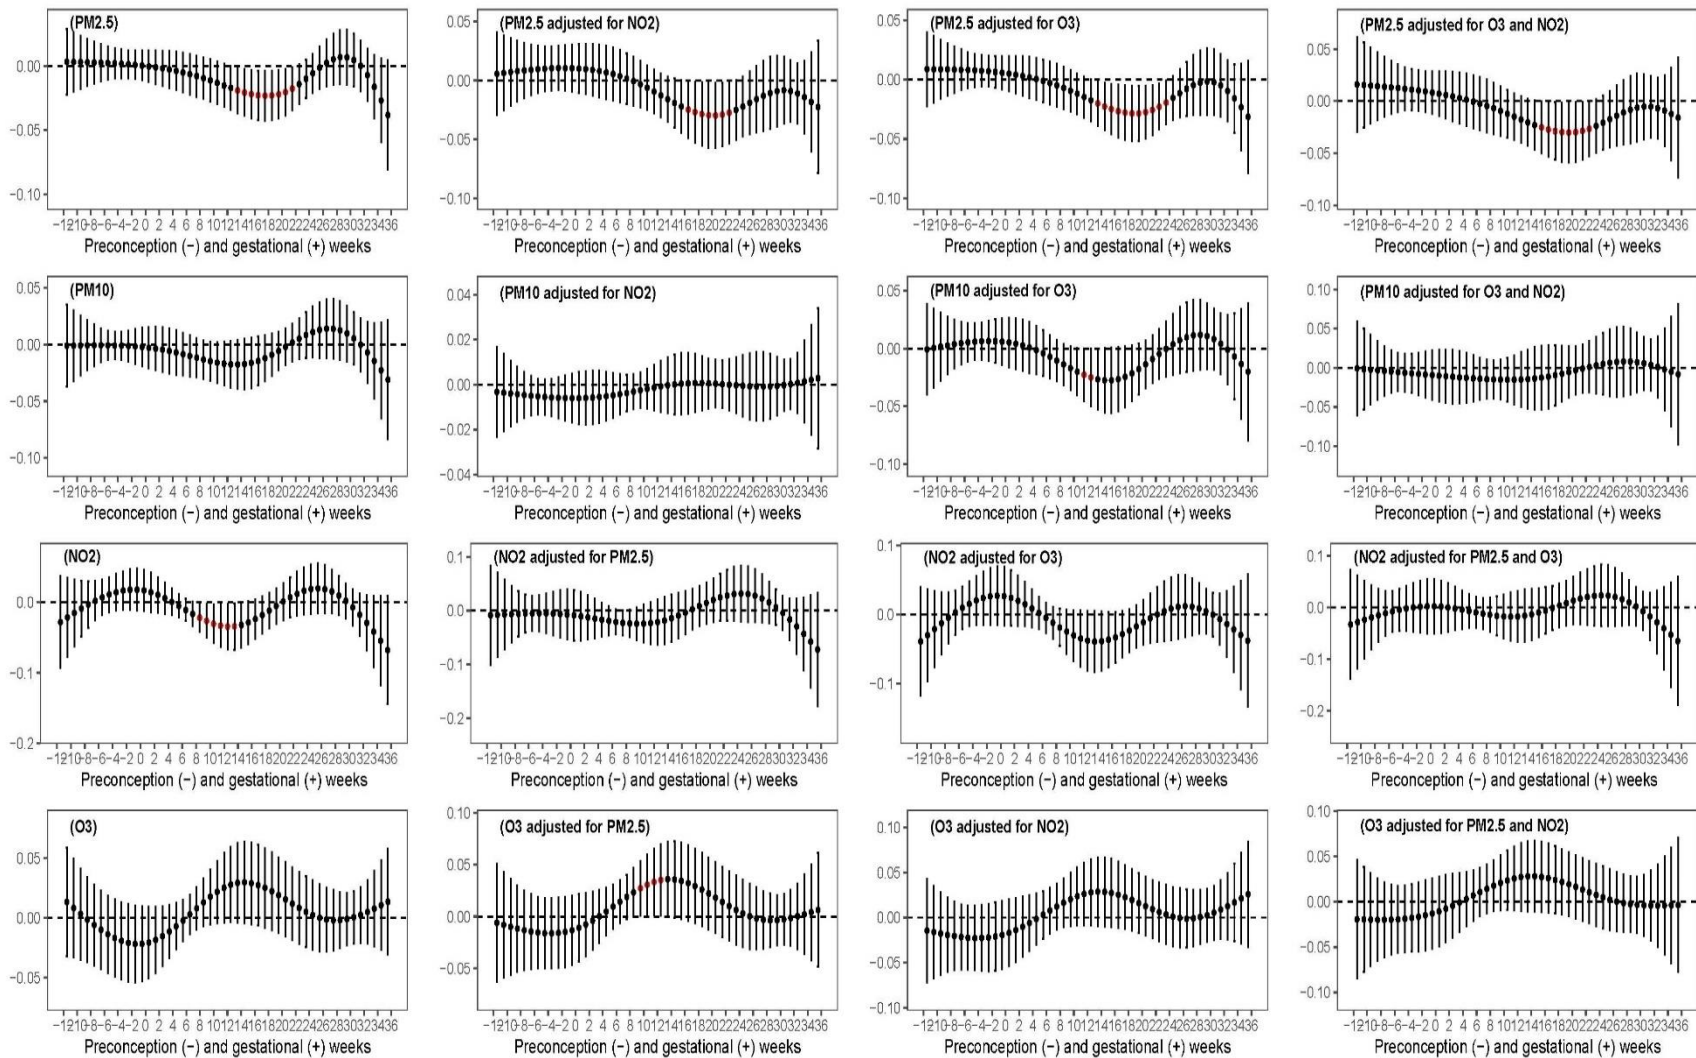

**eFigure 3. Sensitivity analysis with multiple pollutants in DLM.** Associations were adjusted for weekly temperature, maternal age, education, pre-pregnancy body mass index, maternal ethnicity and nativity, marital status, and birth order. Effect estimation was based on per IQR increases in each air pollutant (i.e., 4  $\mu\text{g}/\text{m}^3$ , 12  $\mu\text{g}/\text{m}^3$ , 11 ppb, and 15 ppb for  $\text{PM}_{2.5}$ , and  $\text{PM}_{10}$ ,  $\text{NO}_2$ , and  $\text{O}_3$ , respectively).

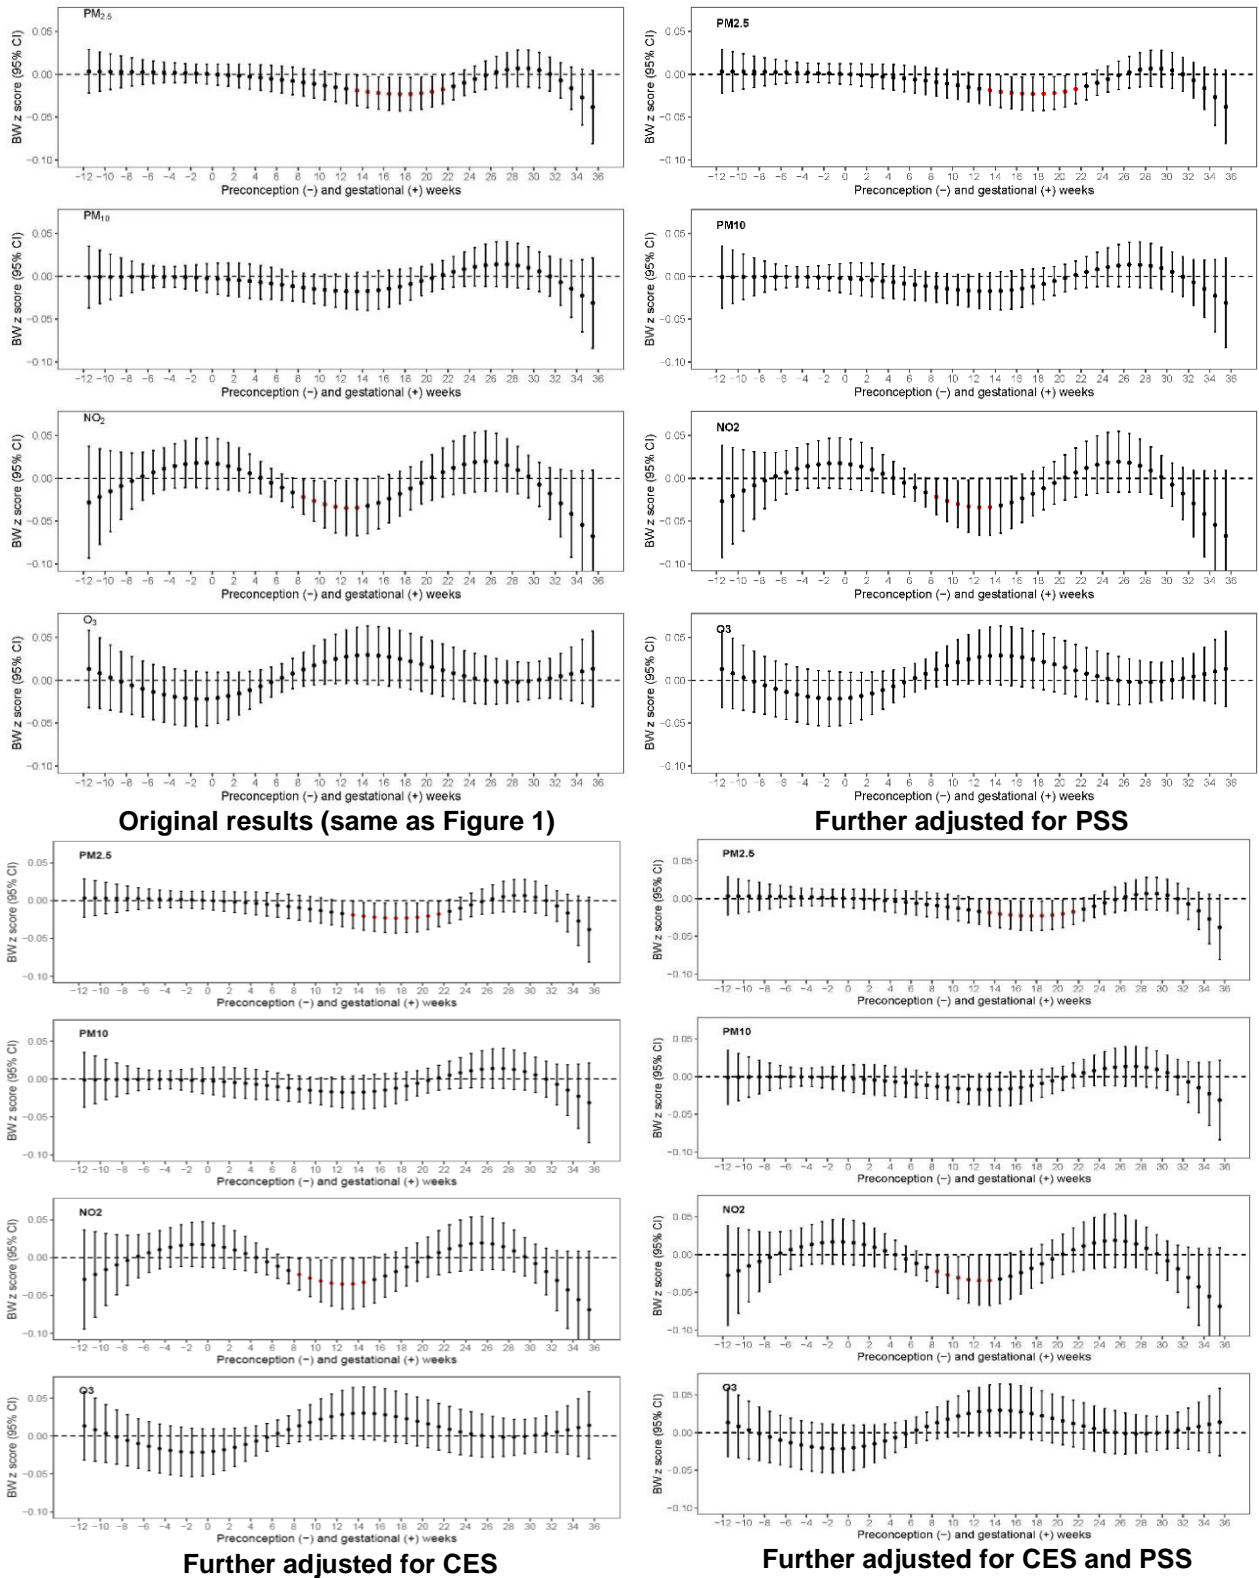

**eFigure 4. Sensitivity analysis adjusting for CES, PSS, or both.** Associations were further adjusted for weekly temperature, maternal age, education, pre-pregnancy body mass index, maternal ethnicity and nativity, marital status, and birth order. Effect estimation was based on per IQR increases in each air pollutant (i.e., 4  $\mu\text{g}/\text{m}^3$ , 12  $\mu\text{g}/\text{m}^3$ , 11 ppb, and 15 ppb for  $\text{PM}_{2.5}$ , and  $\text{PM}_{10}$ ,  $\text{NO}_2$ , and  $\text{O}_3$ , respectively).



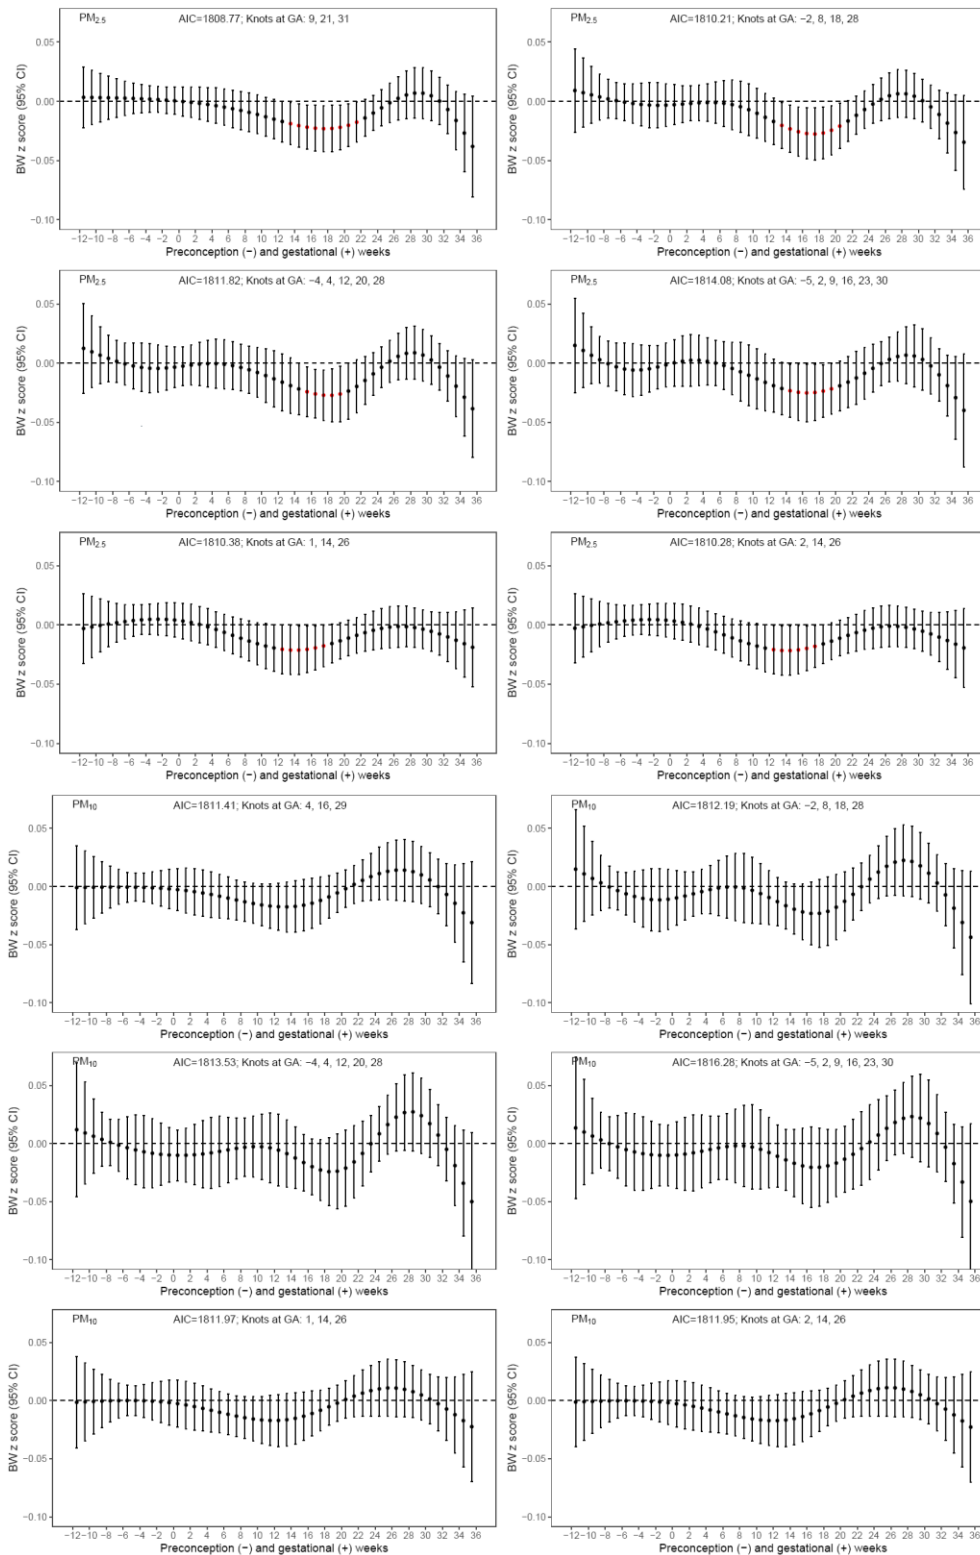

**eFigure 5a. Sensitivity analysis with various knots placement for PM<sub>2.5</sub> and PM<sub>10</sub>.** Model fitting and knots selection were based on minimized AIC. Associations were adjusted for weekly temperature, maternal age, education, pre-pregnancy body mass index, maternal ethnicity and nativity, marital status, and birth order. Effect estimation was based on per IQR increases in each air pollutant (i.e., 4  $\mu\text{g}/\text{m}^3$ , 12  $\mu\text{g}/\text{m}^3$  for PM<sub>2.5</sub> and PM<sub>10</sub>, respectively).

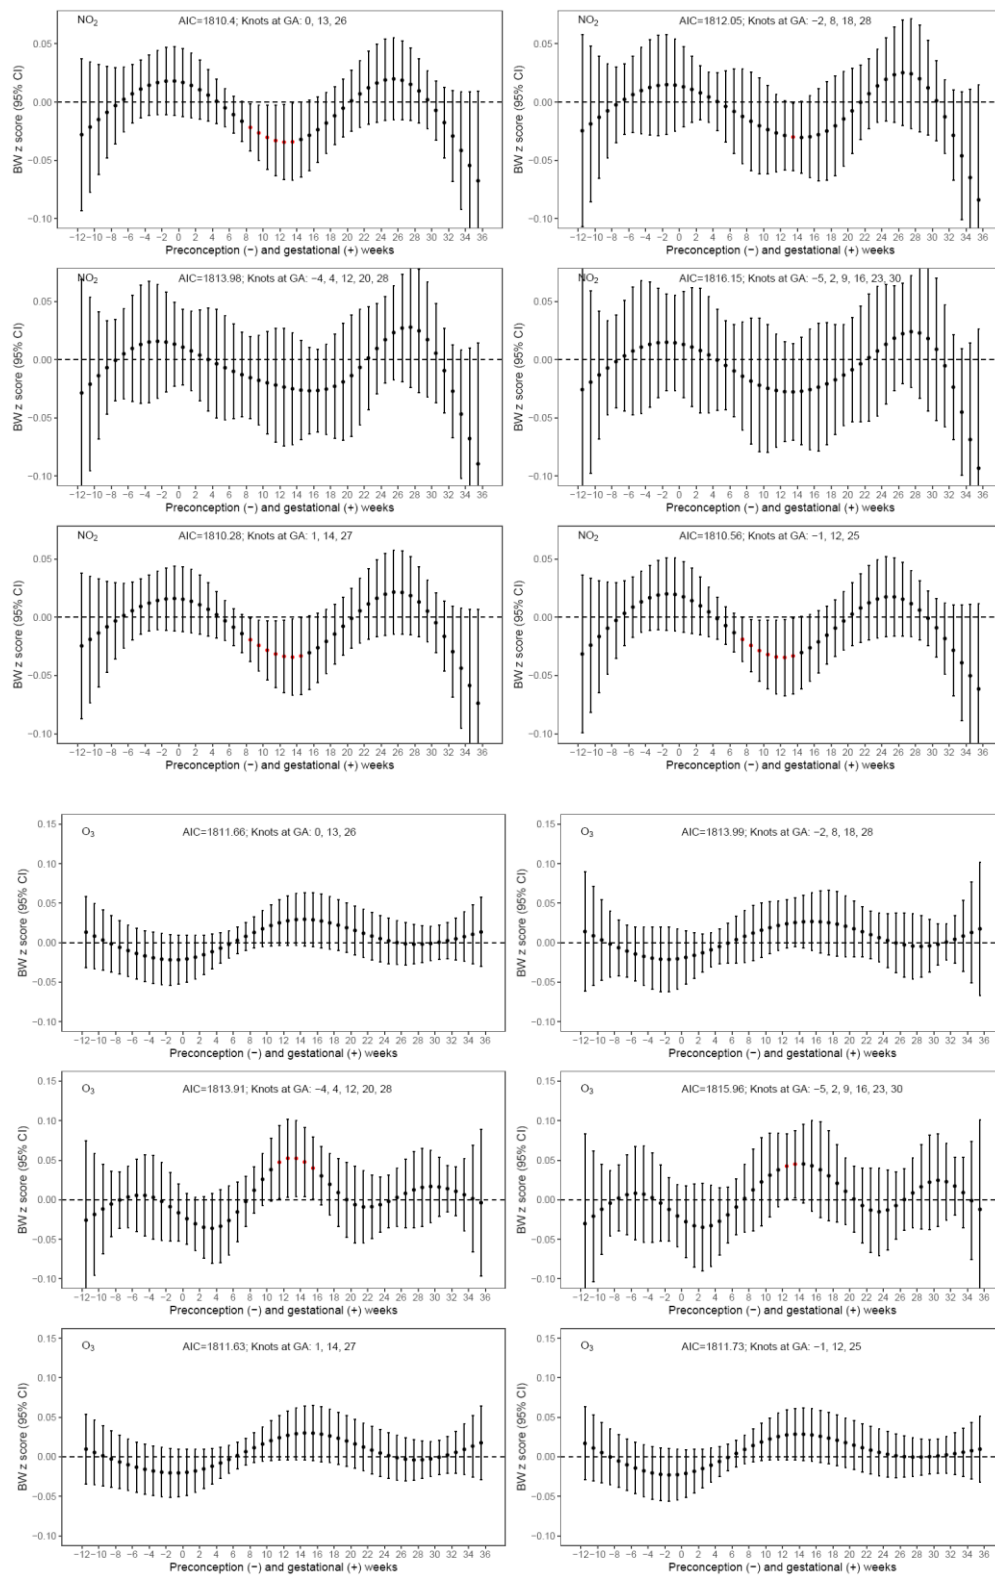

**eFigure 5b. Sensitivity analysis with various knots placement for NO<sub>2</sub> and O<sub>3</sub>.** Model fitting and knots selection were based on minimized AIC. Associations were adjusted for weekly temperature, maternal age, education, pre-pregnancy body mass index, maternal ethnicity and nativity, marital status, and birth order. Effect estimation was based on per IQR increases in each air pollutant (i.e., 11 ppb, and 15 ppb for NO<sub>2</sub> and O<sub>3</sub>, respectively).

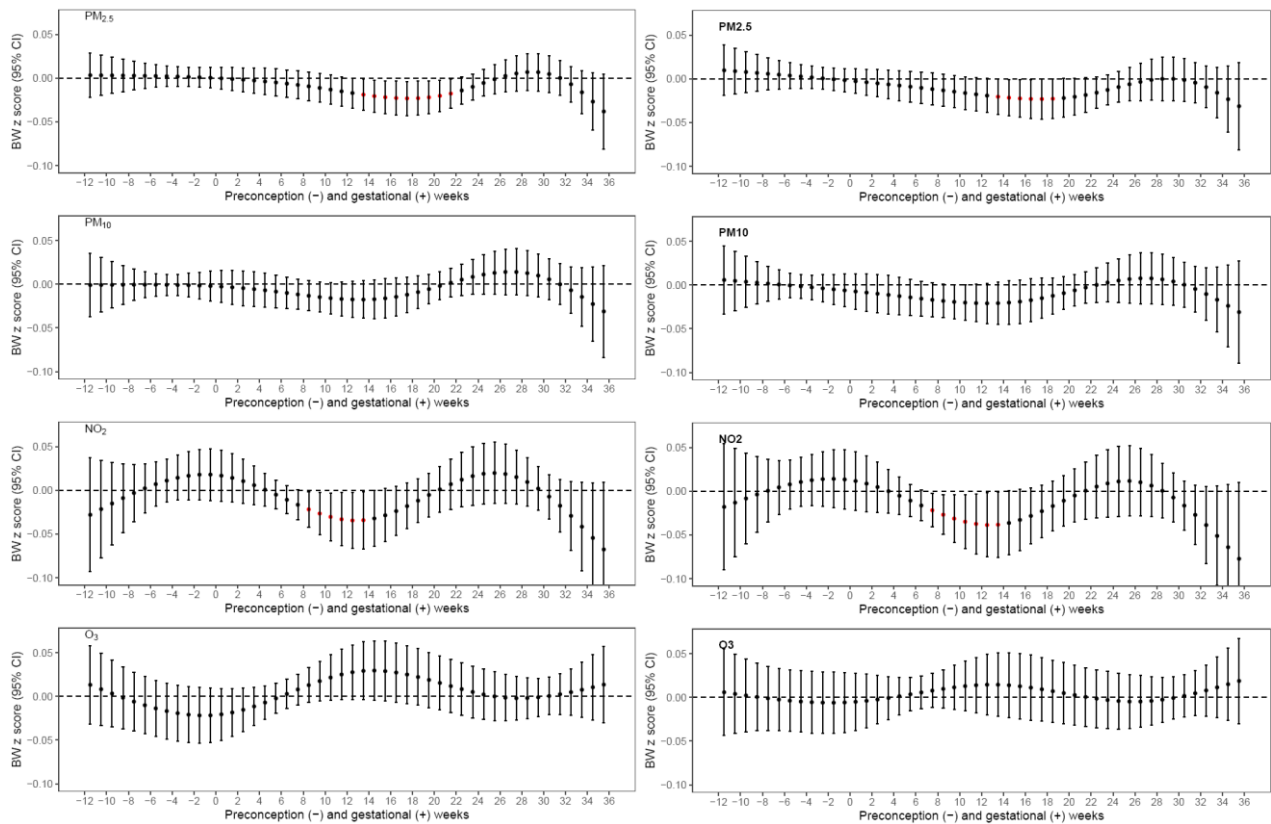

Original results

Complete case analysis results

**eFigure 6. Sensitivity analysis with complete cases.** In the complete case analysis, 114 participants were removed due to missingness of ethnicity (n=35), cohabitating status (n=103), and education (n=34). Associations were adjusted for weekly temperature, maternal age, education, pre-pregnancy body mass index, maternal ethnicity and nativity, marital status, and birth order. Effect estimation was based on per IQR increases in each air pollutant (i.e., 4  $\mu\text{g}/\text{m}^3$ , 12  $\mu\text{g}/\text{m}^3$ , 11 ppb, and 15 ppb for PM<sub>2.5</sub>, and PM<sub>10</sub>, NO<sub>2</sub>, and O<sub>3</sub>, respectively).
